# Supplementary material for: Hsa_circ_0054633 in peripheral blood can be used as a diagnostic biomarker of pre-diabetes and type 2 diabetes mellitus
Source: PubMed Central journal article supplement (PMC5329094; doi:10.1007/s00592-016-0943-0), 2016-11-23
Supplement: 592_2016_943_MOESM3_ESM.pdf [file 592_2016_943_MOESM3_ESM.pdf]

**Supplementary Table 5. Differential expressed circRNAs in the T2DM group of the first cohort.**

| Upregulated         | P value | Fold change | Downregulated       | P value | Fold change | Downregulated       | P value |
|---------------------|---------|-------------|---------------------|---------|-------------|---------------------|---------|
| hsa_circ_0068087    | 0.008   | 3.2         | hsa_circ_0024204    | <0.001  | 2.1         | hsa_circ_0129397    | 0.002   |
| hsa_circ_0054633    | 0.005   | 2.9         | hsa_circ_0038475    | 0.017   | 2.0         | hsa-circRNA12505-55 | 0.041   |
| hsa_circ_0124636    | 0.002   | 2.8         | hsa_circ_0115355    | <0.001  | 2.5         | hsa_circ_0009070    | 0.004   |
| hsa_circ_0061113    | 0.046   | 2.6         | hsa_circ_0123377    | <0.001  | 2.4         | hsa_circ_0092672    | 0.003   |
| hsa-circRNA13247-1  | 0.028   | 2.6         | hsa_circ_0057526    | <0.001  | 2.0         | hsa_circ_0035593    | 0.005   |
| hsa_circ_0118599    | 0.046   | 2.6         | hsa-circRNA14362-13 | 0.007   | 2.0         | hsa_circ_0054734    | 0.006   |
| hsa-circRNA9652-1   | 0.021   | 2.6         | hsa-circRNA12505-40 | 0.003   | 2.1         | hsa_circ_0021780    | <0.001  |
| hsa_circ_0139110    | 0.009   | 2.6         | hsa_circ_0099580    | <0.001  | 3.0         | hsa_circ_0071855    | <0.001  |
| hsa_circ_0062596    | 0.018   | 2.5         | hsa_circ_0132149    | <0.001  | 2.2         | hsa-circRNA2177-30  | <0.001  |
| hsa_circ_0062195    | 0.046   | 2.5         | hsa_circ_0099712    | <0.001  | 2.1         | hsa_circ_0016278    | 0.027   |
| hsa_circ_0105688    | 0.022   | 2.5         | hsa_circ_0002949    | 0.016   | 2.0         | hsa_circ_0109315    | <0.001  |
| hsa_circ_0080192    | 0.040   | 2.5         | hsa_circ_0119824    | 0.004   | 2.3         | hsa_circ_0028010    | 0.004   |
| hsa_circ_0018508    | 0.007   | 2.4         | hsa-circRNA10051-8  | 0.007   | 2.3         | hsa_circ_0140073    | <0.001  |
| hsa_circ_0133936    | 0.016   | 2.4         | hsa_circ_0083544    | 0.013   | 2.1         | hsa_circ_0039353    | 0.004   |
| hsa_circ_0092267    | 0.038   | 2.4         | hsa_circ_0120951    | <0.001  | 2.6         | hsa_circ_0029681    | <0.001  |
| hsa_circ_0081980    | 0.013   | 2.4         | hsa_circ_0085163    | <0.001  | 2.1         | hsa-circRNA10165-8  | <0.001  |
| hsa_circ_0084597    | 0.012   | 2.4         | hsa_circ_0139952    | 0.009   | 2.4         | hsa-circRNA15265-3  | <0.001  |
| hsa_circ_0103926    | 0.011   | 2.4         | hsa_circ_0138400    | <0.001  | 2.1         | hsa_circ_0094900    | <0.001  |
| hsa_circ_0066551    | 0.003   | 2.4         | hsa-circRNA2177-25  | <0.001  | 2.6         | hsa-circRNA14910-11 | <0.001  |
| hsa_circ_0011082    | 0.048   | 2.3         | hsa_circ_0087243    | 0.003   | 2.1         | hsa_circ_0095180    | 0.048   |
| hsa_circ_0082410    | 0.032   | 2.3         | hsa_circ_0023761    | <0.001  | 2.1         | hsa_circ_0031862    | 0.011   |
| hsa_circ_0119529    | 0.010   | 2.3         | hsa_circ_0071857    | <0.001  | 2.2         | hsa-circRNA1958-5   | 0.012   |
| hsa_circ_0003071    | 0.049   | 2.3         | hsa-circRNA1958-2   | 0.002   | 2.7         | hsa-circRNA5762-14  | <0.001  |
| hsa_circ_0069264    | 0.030   | 2.3         | hsa_circ_0116853    | 0.004   | 2.1         | hsa_circ_0071865    | <0.001  |
| hsa_circ_0111612    | 0.047   | 2.3         | hsa_circ_0085080    | 0.002   | 2.1         | hsa-circRNA6396-26  | 0.008   |
| hsa_circ_0075700    | 0.028   | 2.3         | hsa_circ_0126845    | <0.001  | 2.1         | hsa_circ_0087215    | <0.001  |
| hsa_circ_0077770    | 0.003   | 2.3         | hsa_circ_0085445    | 0.017   | 2.1         | hsa-circRNA10329-63 | 0.041   |
| hsa_circ_0120470    | 0.044   | 2.3         | hsa_circ_0005684    | <0.001  | 2.1         | hsa_circ_0117148    | <0.001  |
| hsa_circ_0006010    | 0.009   | 2.2         | hsa_circ_0000673    | <0.001  | 2.6         | hsa_circ_0120341    | 0.020   |
| hsa_circ_0069862    | 0.019   | 2.2         | hsa_circ_0094904    | <0.001  | 2.6         | hsa_circ_0053327    | 0.003   |
| hsa-circRNA4746-8   | 0.030   | 2.2         | hsa_circ_0134682    | 0.017   | 2.0         | hsa_circ_0027801    | 0.001   |
| hsa_circ_0054129    | 0.001   | 2.2         | hsa_circ_0021570    | 0.002   | 2.1         | hsa_circ_0025977    | <0.001  |
| hsa_circ_0086623    | 0.021   | 2.2         | hsa_circ_0074770    | <0.001  | 2.1         | hsa-circRNA15591-21 | 0.008   |
| hsa_circ_0007858    | 0.049   | 2.2         | hsa_circ_0058526    | <0.001  | 2.1         | hsa-circRNA3081-40  | <0.001  |
| hsa_circ_0121546    | 0.022   | 2.2         | hsa_circ_0030737    | <0.001  | 2.1         | hsa_circ_0004083    | 0.014   |
| hsa_circ_0026158    | 0.016   | 2.2         | hsa_circ_0028009    | 0.002   | 2.8         | hsa-circRNA5762-18  | 0.001   |
| hsa_circ_0028886    | 0.026   | 2.2         | hsa_circ_0103024    | <0.001  | 2.2         | hsa_circ_0007090    | 0.008   |
| hsa_circ_0086409    | 0.009   | 2.2         | hsa-circRNA12910-7  | <0.001  | 2.1         | hsa_circ_0025973    | <0.001  |
| hsa_circ_0054647    | 0.033   | 2.2         | hsa_circ_0071841    | <0.001  | 2.1         | hsa_circ_0060232    | 0.042   |
| hsa-circRNA11217    | 0.017   | 2.2         | hsa_circ_0123376    | <0.001  | 2.1         | hsa_circ_0119707    | 0.003   |
| hsa_circ_0030004    | 0.008   | 2.2         | hsa_circ_0120335    | 0.009   | 2.1         | hsa-circRNA7969-7   | 0.006   |
| hsa_circ_0133005    | 0.001   | 2.2         | hsa_circ_0012364    | 0.017   | 2.1         | hsa_circ_0131079    | <0.001  |
| hsa-circRNA15423-15 | 0.029   | 2.2         | hsa_circ_0086460    | 0.006   | 2.2         | hsa_circ_0001347    | 0.004   |
| hsa_circ_0043382    | 0.032   | 2.1         | hsa_circ_0028967    | 0.001   | 2.1         | hsa_circ_0136924    | 0.031   |
| hsa_circ_0080517    | 0.015   | 2.1         | hsa-circRNA6282-41  | 0.012   | 2.0         | hsa_circ_0044870    | <0.001  |
| hsa_circ_0128150    | 0.012   | 2.1         | hsa_circ_0067587    | <0.001  | 2.1         | hsa_circ_0047632    | 0.028   |
| hsa_circ_0057701    | 0.045   | 2.1         | hsa-circRNA949-20   | <0.001  | 2.0         | hsa_circ_0101921    | 0.014   |
| hsa_circ_0033065    | 0.034   | 2.1         | hsa_circ_0053664    | <0.001  | 2.1         | hsa_circ_0024206    | 0.007   |
| hsa_circ_0060806    | 0.038   | 2.1         | hsa_circ_0135645    | 0.003   | 3.0         | hsa-circRNA15511-9  | 0.015   |
| hsa_circ_0102413    | 0.009   | 2.1         | hsa_circ_0054554    | 0.021   | 2.1         | hsa_circ_0071390    | 0.003   |
| hsa_circ_0028442    | 0.026   | 2.1         | hsa_circ_0117150    | <0.001  | 2.0         | hsa_circ_0038470    | <0.001  |
| hsa_circ_0021637    | 0.037   | 2.1         | hsa_circ_0115373    | <0.001  | 2.2         | hsa_circ_0134173    | 0.004   |
| hsa_circ_0122759    | 0.002   | 2.1         | hsa_circ_0037041    | <0.001  | 2.1         | hsa_circ_0099702    | <0.001  |
| hsa_circ_0126861    | 0.001   | 2.1         | hsa-circRNA3310-95  | 0.005   | 2.0         | hsa_circ_0119710    | 0.002   |

|                    |       |     |                     |        |     |                     |        |
|--------------------|-------|-----|---------------------|--------|-----|---------------------|--------|
| hsa_circ_0047479   | 0.007 | 2.1 | hsa-circRNA12505-5  | 0.003  | 2.1 | hsa_circ_0129029    | 0.007  |
| hsa_circ_0129230   | 0.026 | 2.1 | hsa_circ_0001467    | <0.001 | 2.4 | hsa_circ_0094899    | 0.003  |
| hsa_circ_0133090   | 0.017 | 2.1 | hsa_circ_0064736    | <0.001 | 2.0 | hsa_circ_0023779    | <0.001 |
| hsa_circ_0136091   | 0.020 | 2.1 | hsa_circ_0066868    | <0.001 | 2.0 | hsa-circRNA15564-3  | 0.003  |
| hsa_circ_0010879   | 0.008 | 2.1 | hsa_circ_0013616    | <0.001 | 2.1 | hsa_circ_0132592    | 0.011  |
| hsa_circ_0100191   | 0.017 | 2.1 | hsa_circ_0028966    | <0.001 | 2.1 | hsa_circ_0040358    | 0.019  |
| hsa_circ_0050044   | 0.040 | 2.1 | hsa_circ_0092511    | 0.013  | 2.4 | hsa_circ_0105527    | <0.001 |
| hsa_circ_0054646   | 0.012 | 2.1 | hsa_circ_0053636    | 0.027  | 2.0 | hsa_circ_0066232    | 0.003  |
| hsa_circ_0090453   | 0.039 | 2.0 | hsa_circ_0025979    | <0.001 | 2.1 | hsa_circ_0117152    | <0.001 |
| hsa_circ_0061012   | 0.009 | 2.0 | hsa-circRNA6213-4   | <0.001 | 2.1 | hsa_circ_0035597    | 0.009  |
| hsa_circ_0130694   | 0.034 | 2.0 | hsa_circ_0085446    | 0.003  | 2.0 | hsa_circ_0121926    | 0.035  |
| hsa-circRNA3289    | 0.007 | 2.0 | hsa_circ_0119159    | <0.001 | 2.1 | hsa_circ_0054555    | <0.001 |
| hsa_circ_0048884   | 0.003 | 2.0 | hsa_circ_0067586    | <0.001 | 2.1 | hsa_circ_0025985    | <0.001 |
| hsa_circ_0126764   | 0.017 | 2.0 | hsa_circ_0031047    | 0.012  | 2.2 | hsa_circ_0041697    | <0.001 |
| hsa-circRNA12986-3 | 0.044 | 2.0 | hsa_circ_0089925    | 0.005  | 2.3 | hsa_circ_0000544    | <0.001 |
| hsa_circ_0106442   | 0.032 | 2.0 | hsa_circ_0108704    | 0.019  | 2.1 | hsa_circ_0110429    | <0.001 |
| hsa_circ_0026455   | 0.027 | 2.0 | hsa_circ_0054812    | 0.001  | 2.2 | hsa_circ_0049355    | 0.014  |
| hsa-circRNA5933-3  | 0.017 | 2.0 | hsa-circRNA12883-1C | <0.001 | 2.1 | hsa_circ_0076215    | 0.019  |
| hsa_circ_0023866   | 0.031 | 2.0 | hsa_circ_0056990    | 0.014  | 2.3 | hsa_circ_0054731    | <0.001 |
| hsa_circ_0061787   | 0.026 | 2.0 | hsa_circ_0015676    | 0.004  | 2.0 | hsa_circ_0140074    | 0.003  |
| hsa_circ_0092576   | 0.048 | 2.0 | hsa_circ_0096843    | 0.003  | 2.4 | hsa_circ_0117173    | 0.005  |
| hsa_circ_0065692   | 0.024 | 2.0 | hsa_circ_0057529    | <0.001 | 2.1 | hsa-circRNA8659-9   | <0.001 |
| hsa_circ_0111976   | 0.005 | 2.0 | hsa_circ_0098946    | <0.001 | 2.1 | hsa_circ_0120602    | 0.004  |
| hsa_circ_0128506   | 0.006 | 2.0 | hsa_circ_0002316    | 0.026  | 2.0 | hsa_circ_0119827    | <0.001 |
|                    |       |     | hsa-circRNA16072-9  | <0.001 | 2.2 | hsa_circ_0120560    | <0.001 |
|                    |       |     | hsa_circ_0047877    | <0.001 | 2.0 | hsa_circ_0017335    | <0.001 |
|                    |       |     | hsa_circ_0071866    | <0.001 | 2.1 | hsa_circ_0024215    | <0.001 |
|                    |       |     | hsa_circ_0140077    | <0.001 | 2.6 | hsa_circ_0115372    | <0.001 |
|                    |       |     | hsa_circ_0126894    | 0.003  | 2.2 | hsa_circ_0093710    | 0.005  |
|                    |       |     | hsa_circ_0134291    | 0.002  | 2.0 | hsa_circ_0095347    | 0.003  |
|                    |       |     | hsa-circRNA12505-2  | <0.001 | 2.3 | hsa_circ_0037889    | <0.001 |
|                    |       |     | hsa_circ_0091155    | <0.001 | 2.2 | hsa-circRNA7944-6   | 0.010  |
|                    |       |     | hsa_circ_0129896    | <0.001 | 2.3 | hsa-circRNA10450-3C | 0.002  |
|                    |       |     | hsa_circ_0101628    | 0.003  | 2.1 | hsa_circ_0071229    | <0.001 |
|                    |       |     | hsa_circ_0040028    | <0.001 | 2.5 | hsa_circ_0127538    | 0.015  |
|                    |       |     | hsa_circ_0118394    | 0.001  | 2.0 | hsa-circRNA12505-31 | <0.001 |
|                    |       |     | hsa-circRNA12505-2C | <0.001 | 2.2 | hsa_circ_0047373    | 0.009  |
|                    |       |     | hsa_circ_0030740    | <0.001 | 3.1 | hsa_circ_0129396    | <0.001 |
|                    |       |     | hsa_circ_0054778    | <0.001 | 2.7 | hsa_circ_0140563    | <0.001 |
|                    |       |     | hsa_circ_0003905    | 0.001  | 2.2 | hsa_circ_0073470    | <0.001 |
|                    |       |     | hsa_circ_0069228    | <0.001 | 2.4 | hsa_circ_0038472    | <0.001 |
|                    |       |     | hsa-circRNA14020-21 | <0.001 | 2.2 | hsa-circRNA15591-31 | 0.002  |
|                    |       |     | hsa_circ_0117499    | <0.001 | 2.1 | hsa_circ_0083837    | 0.034  |
|                    |       |     | hsa_circ_0071853    | <0.001 | 2.1 | hsa_circ_0106175    | 0.004  |
|                    |       |     | hsa_circ_0016817    | 0.027  | 2.2 | hsa_circ_0124317    | 0.007  |
|                    |       |     | hsa_circ_0069533    | 0.003  | 2.0 | hsa_circ_0053760    | 0.006  |
|                    |       |     | hsa_circ_0117183    | <0.001 | 2.0 | hsa_circ_0052756    | 0.003  |
|                    |       |     | hsa_circ_0118288    | 0.008  | 2.1 | hsa_circ_0105886    | <0.001 |
|                    |       |     | hsa_circ_0091154    | <0.001 | 2.0 | hsa_circ_0030731    | <0.001 |

| <b>Fold change</b> | <b>Downregulated</b> | <b>P value</b> | <b>Fold change</b> | <b>Downregulated</b> | <b>P value</b> | <b>Fold change</b> |
|--------------------|----------------------|----------------|--------------------|----------------------|----------------|--------------------|
| 2.2                | hsa_circ_0009133     | 0.006          | 2.1                | hsa_circ_0094884     | <0.001         | 2.0                |
| 2.0                | hsa_circ_0047651     | <0.001         | 2.0                | hsa_circ_0127463     | <0.001         | 2.1                |
| 2.1                | hsa_circ_0111501     | <0.001         | 2.0                | hsa_circ_0083169     | <0.001         | 2.0                |
| 2.1                | hsa_circ_0089932     | 0.019          | 2.1                | hsa_circ_0096518     | <0.001         | 2.1                |
| 2.0                | hsa_circ_0088295     | <0.001         | 2.0                | hsa_circ_0023757     | 0.002          | 2.1                |
| 3.1                | hsa_circ_0077656     | <0.001         | 2.0                | hsa-circRNA5011-23   | <0.001         | 2.2                |
| 2.4                | hsa_circ_0054095     | <0.001         | 2.0                | hsa_circ_0023780     | <0.001         | 2.1                |
| 2.1                | hsa_circ_0120954     | 0.001          | 2.7                | hsa_circ_0084642     | 0.004          | 2.5                |
| 2.6                | hsa_circ_0104186     | 0.003          | 2.5                | hsa-circRNA10656-34  | <0.001         | 2.1                |
| 2.3                | hsa_circ_0140078     | <0.001         | 2.2                | hsa-circRNA12520-172 | <0.001         | 2.1                |
| 2.0                | hsa_circ_0114306     | 0.024          | 2.0                | hsa_circ_0105778     | 0.001          | 2.2                |
| 2.4                | hsa-circRNA14317-3   | <0.001         | 2.3                | hsa_circ_0098355     | 0.004          | 2.5                |
| 2.2                | hsa_circ_0114302     | <0.001         | 2.4                | hsa-circRNA409-3     | <0.001         | 2.2                |
| 2.3                | hsa-circRNA10051-11  | 0.016          | 2.1                | hsa_circ_0104551     | <0.001         | 2.1                |
| 2.0                | hsa_circ_0028968     | 0.002          | 2.2                | hsa_circ_0030739     | <0.001         | 2.6                |
| 2.2                | hsa_circ_0009036     | <0.001         | 2.2                | hsa_circ_0120604     | 0.005          | 2.1                |
| 2.0                | hsa_circ_0015678     | 0.002          | 2.1                | hsa_circ_0106657     | 0.002          | 2.1                |
| 2.3                | hsa_circ_0099436     | 0.031          | 2.6                | hsa_circ_0057764     | 0.016          | 2.4                |
| 2.1                | hsa_circ_0053329     | <0.001         | 2.2                | hsa_circ_0099711     | <0.001         | 3.1                |
| 2.0                | hsa_circ_0071220     | <0.001         | 2.1                | hsa_circ_0099990     | <0.001         | 2.1                |
| 2.1                | hsa_circ_0127531     | 0.045          | 2.8                | hsa_circ_0033112     | <0.001         | 2.1                |
| 2.0                | hsa_circ_0028965     | <0.001         | 2.1                | hsa-circRNA11806-28  | <0.001         | 2.7                |
| 2.0                | hsa_circ_0028008     | 0.008          | 2.2                | hsa_circ_0132239     | 0.002          | 2.1                |
| 2.3                | hsa_circ_0023773     | 0.001          | 2.2                | hsa_circ_0104275     | <0.001         | 2.1                |
| 2.1                | hsa_circ_0107665     | 0.022          | 2.4                | hsa_circ_0054730     | 0.002          | 2.2                |
| 2.0                | hsa_circ_0038250     | 0.001          | 2.3                | hsa-circRNA2591-9    | 0.002          | 2.0                |
| 2.0                | hsa_circ_0138403     | <0.001         | 2.1                | hsa-circRNA7550-33   | <0.001         | 2.1                |
| 2.3                | hsa_circ_0053641     | <0.001         | 2.3                | hsa-circRNA2198-7    | 0.007          | 2.4                |
| 2.3                | hsa_circ_0139201     | <0.001         | 2.0                | hsa_circ_0120323     | <0.001         | 2.0                |
| 2.2                | hsa_circ_0037887     | <0.001         | 2.5                | hsa_circ_0120339     | <0.001         | 2.2                |
| 2.2                | hsa_circ_0031939     | 0.044          | 2.3                | hsa_circ_0008855     | <0.001         | 2.2                |
| 2.2                | hsa-circRNA6756-36   | <0.001         | 2.0                | hsa-circRNA4610-36   | <0.001         | 2.1                |
| 2.3                | hsa_circ_0069397     | <0.001         | 2.1                | hsa_circ_0120342     | 0.001          | 2.1                |
| 2.0                | hsa_circ_0140287     | <0.001         | 2.1                | hsa_circ_0054761     | <0.001         | 2.3                |
| 2.0                | hsa_circ_0067588     | <0.001         | 2.1                | hsa-circRNA12505-51  | 0.002          | 2.2                |
| 2.3                | hsa-circRNA7697-20   | 0.019          | 2.3                | hsa-circRNA12520-126 | <0.001         | 2.3                |
| 2.1                | hsa_circ_0130488     | <0.001         | 2.1                | hsa_circ_0041155     | 0.003          | 2.0                |
| 2.4                | hsa-circRNA2198-13   | 0.003          | 2.7                | hsa_circ_0084643     | 0.007          | 2.4                |
| 2.0                | hsa_circ_0054728     | 0.004          | 2.1                | hsa_circ_0120607     | <0.001         | 2.3                |
| 2.1                | hsa_circ_0138402     | 0.001          | 2.0                | hsa_circ_0027702     | 0.018          | 2.6                |
| 2.1                | hsa-circRNA16072-18  | <0.001         | 2.0                | hsa_circ_0075564     | <0.001         | 2.3                |
| 2.0                | hsa_circ_0069532     | 0.016          | 2.1                | hsa-circRNA8505-7    | <0.001         | 2.2                |
| 2.2                | hsa-circRNA12693-13  | <0.001         | 2.0                | hsa_circ_0140076     | <0.001         | 2.4                |
| 2.1                | hsa_circ_0026573     | 0.010          | 2.4                | hsa_circ_0138382     | <0.001         | 2.4                |
| 2.1                | hsa-circRNA9015-34   | <0.001         | 2.6                | hsa_circ_0071858     | <0.001         | 2.1                |
| 2.2                | hsa-circRNA3487-6    | <0.001         | 2.4                | hsa_circ_0029812     | 0.017          | 2.1                |
| 2.3                | hsa_circ_0075045     | 0.003          | 2.0                | hsa_circ_0031081     | 0.030          | 2.0                |
| 2.2                | hsa-circRNA10767     | 0.006          | 2.0                | hsa_circ_0030732     | <0.001         | 2.6                |
| 2.0                | hsa_circ_0072732     | 0.002          | 2.4                | hsa_circ_0015672     | 0.005          | 2.0                |
| 2.1                | hsa_circ_0127462     | <0.001         | 2.0                | hsa_circ_0111502     | <0.001         | 2.2                |
| 2.2                | hsa_circ_0105010     | <0.001         | 2.5                | hsa_circ_0134171     | 0.005          | 2.3                |
| 2.1                | hsa_circ_0081889     | <0.001         | 2.1                | hsa_circ_0016397     | <0.001         | 2.4                |
| 2.1                | hsa_circ_0129104     | 0.022          | 2.6                | hsa_circ_0001168     | 0.005          | 2.1                |
| 2.3                | hsa-circRNA15514-9   | <0.001         | 2.1                | hsa-circRNA10072-4   | <0.001         | 2.0                |

|     |                     |        |     |                     |        |     |
|-----|---------------------|--------|-----|---------------------|--------|-----|
| 2.0 | hsa_circ_0085406    | <0.001 | 2.7 | hsa-circRNA7550-9   | <0.001 | 2.1 |
| 2.9 | hsa_circ_0084645    | 0.006  | 2.5 | hsa-circRNA5854-5   | 0.010  | 2.0 |
| 2.2 | hsa_circ_0133355    | 0.007  | 2.5 | hsa_circ_0022301    | 0.003  | 2.2 |
| 2.0 | hsa-circRNA12520-15 | 0.001  | 2.2 | hsa-circRNA6489-15  | <0.001 | 2.1 |
| 2.1 | hsa-circRNA4380-15  | <0.001 | 2.1 | hsa_circ_0120605    | 0.008  | 2.0 |
| 2.0 | hsa_circ_0136904    | <0.001 | 2.4 | hsa-circRNA3081-2   | <0.001 | 2.1 |
| 3.2 | hsa_circ_0039423    | 0.001  | 2.1 | hsa-circRNA7104-135 | <0.001 | 2.0 |
| 2.2 | hsa_circ_0069410    | 0.014  | 2.0 | hsa_circ_0122354    | 0.002  | 2.0 |
| 2.0 | hsa_circ_0013489    | <0.001 | 2.3 | hsa-circRNA4388-10  | 0.003  | 2.3 |
| 2.0 | hsa_circ_0005567    | 0.007  | 2.0 | hsa_circ_0087212    | <0.001 | 2.3 |
| 2.1 | hsa_circ_0136060    | 0.031  | 2.0 | hsa_circ_0140534    | <0.001 | 2.3 |
| 2.6 | hsa-circRNA6510-1   | <0.001 | 2.4 | hsa_circ_0140292    | <0.001 | 2.6 |
| 2.2 | hsa_circ_0057280    | 0.016  | 2.4 | hsa-circRNA7697-35  | 0.004  | 2.0 |
| 2.6 | hsa_circ_0073828    | <0.001 | 2.0 | hsa_circ_0092459    | 0.007  | 2.0 |
| 2.0 | hsa_circ_0126693    | 0.004  | 2.2 | hsa_circ_0079321    | 0.024  | 2.0 |
| 2.1 | hsa-circRNA9640-24  | <0.001 | 2.0 | hsa_circ_0077414    | 0.008  | 2.0 |
| 2.3 | hsa_circ_0085444    | 0.002  | 2.1 | hsa_circ_0112542    | 0.001  | 2.1 |
| 2.4 | hsa-circRNA15511-5  | 0.004  | 2.2 | hsa_circ_0025441    | 0.003  | 2.7 |
| 2.1 | hsa-circRNA9274-3   | 0.023  | 2.0 | hsa_circ_0047630    | <0.001 | 2.6 |
| 2.0 | hsa_circ_0001494    | 0.013  | 2.2 | hsa_circ_0120559    | <0.001 | 2.1 |
| 2.1 | hsa_circ_0001774    | 0.001  | 2.0 | hsa_circ_0022919    | 0.031  | 2.4 |
| 2.2 | hsa_circ_0054985    | <0.001 | 2.2 | hsa_circ_0076400    | <0.001 | 2.1 |
| 2.1 | hsa_circ_0066238    | <0.001 | 2.2 | hsa_circ_0031863    | 0.010  | 2.0 |
| 2.2 | hsa_circ_0127537    | <0.001 | 2.2 | hsa-circRNA12505-15 | 0.001  | 2.5 |
| 2.3 | hsa_circ_0137811    | <0.001 | 2.1 | hsa_circ_0054726    | <0.001 | 2.4 |
| 2.2 | hsa_circ_0130333    | <0.001 | 2.2 | hsa_circ_0120606    | <0.001 | 2.2 |
| 2.1 | hsa_circ_0007018    | <0.001 | 2.2 | hsa_circ_0000849    | <0.001 | 2.1 |
| 2.2 | hsa_circ_0078516    | 0.004  | 2.1 | hsa_circ_0135075    | <0.001 | 2.1 |
| 2.4 | hsa_circ_0119156    | 0.014  | 2.3 | hsa_circ_0122182    | 0.002  | 2.1 |
| 2.3 | hsa_circ_0055894    | <0.001 | 2.0 | hsa-circRNA7619-1   | 0.034  | 2.2 |
| 2.1 | hsa-circRNA14588-10 | <0.001 | 2.2 | hsa_circ_0094898    | <0.001 | 2.1 |
| 2.4 | hsa_circ_0011826    | <0.001 | 2.1 | hsa_circ_0053665    | 0.002  | 2.1 |
| 2.3 | hsa_circ_0060740    | <0.001 | 2.2 | hsa_circ_0126352    | 0.047  | 2.3 |
| 2.0 | hsa_circ_0027365    | <0.001 | 2.1 | hsa_circ_0051623    | 0.048  | 2.0 |
| 2.2 | hsa_circ_0075043    | 0.007  | 3.1 | hsa_circ_0140081    | <0.001 | 2.5 |
| 2.2 | hsa_circ_0135599    | <0.001 | 2.1 | hsa_circ_0034370    | 0.004  | 2.0 |
| 2.1 | hsa_circ_0029870    | <0.001 | 2.1 | hsa_circ_0072730    | 0.002  | 2.3 |
| 2.3 | hsa_circ_0128169    | 0.019  | 2.2 | hsa_circ_0071250    | 0.002  | 3.1 |
| 2.0 | hsa-circRNA12520-31 | 0.002  | 2.2 | hsa_circ_0105779    | <0.001 | 2.3 |
| 2.6 | hsa-circRNA9834-7   | 0.024  | 2.0 | hsa_circ_0038424    | 0.002  | 2.1 |
| 2.0 | hsa_circ_0117172    | 0.009  | 2.1 | hsa_circ_0069885    | 0.003  | 2.0 |
| 2.3 | hsa_circ_0074588    | <0.001 | 2.1 | hsa-circRNA11783-2  | <0.001 | 2.4 |
| 2.4 | hsa_circ_0034966    | 0.018  | 2.0 | hsa-circRNA4380-6   | <0.001 | 2.0 |
| 2.0 | hsa_circ_0140080    | <0.001 | 2.2 | hsa_circ_0053657    | <0.001 | 2.1 |
| 2.3 | hsa-circRNA12520-47 | <0.001 | 2.5 | hsa-circRNA3069-7   | <0.001 | 2.2 |
| 2.1 | hsa_circ_0127442    | <0.001 | 2.0 | hsa_circ_0126839    | <0.001 | 2.2 |
| 2.0 | hsa_circ_0119266    | <0.001 | 2.4 | hsa-circRNA13479-39 | 0.005  | 2.8 |
| 2.4 | hsa_circ_0072733    | 0.005  | 2.0 | hsa_circ_0016790    | 0.004  | 2.9 |
| 2.5 | hsa_circ_0062796    | 0.037  | 2.0 |                     |        |     |
