# Supplementary material for: Hsa_circ_0054633 in peripheral blood can be used as a diagnostic biomarker of pre-diabetes and type 2 diabetes mellitus
Source: Springer Nature journal article supplement (doi:10.1007/s00592-016-0943-0), 2016-11-23
Supplement: MOESM1 [file 11089336]

**Supplementary Table 1. The clinical and demographic characteristics of the first cohort**

|                         | <b>Control group</b><br><b>(n=6)</b> | <b>T2DM group</b><br><b>(n=6)</b> | <b>P value</b> |
|-------------------------|--------------------------------------|-----------------------------------|----------------|
| Male gender             | 3 (50%)                              | 3 (50%)                           | 1              |
| Age(years)              | 60±2.3                               | 62.3±6.2                          | 0.42           |
| Hypertension            | 1 (16.7%)                            | 2 (33.3%)                         | 1              |
| Smoker                  | 1 (16.7%)                            | 1 (16.7%)                         | 1              |
| BMI(kg/m <sup>2</sup> ) | 23.3±2.1                             | 24.7±1.2                          | 0.178          |
| TC(mmol/L)              | 3.5±0.9                              | 3.9±1.1                           | 0.506          |
| TG(mmol/L)              | 0.9±0.2                              | 1.4±0.6                           | 0.073          |
| HDL(mmol/L)             | 1.3±0.3                              | 1.1±0.2                           | 0.202          |
| LDL(mmol/L)             | 1.8±0.7                              | 2.1±0.9                           | 0.559          |
| ALT(U/L)                | 36.3±17.8                            | 33.7±17.9                         | 0.801          |
| AST(U/L)                | 23.5±3.8                             | 19.8±7.3                          | 0.299          |
| Scr(μmol/L)             | 58.7±3.9                             | 60.0±10.7                         | 0.781          |
| FT4I(pmol/L)            | 14.4±2.7                             | 14.1±1.9                          | 0.801          |
| HbA1c (%)               | 5.4±0.1                              | 6.9±0.7                           | 0.003          |
| HbA1c (mmol/mol)        | 35.0±1.9                             | 52.2±7.8                          | 0.002          |
| GLU(mmol/L)             | 5.0±0.4                              | 9.8±2.0                           | <0.001         |
| OGTT 2h(mmol/L)         | 7.0±0.4                              | 13.8±1.3                          | <0.001         |

**Supplementary Table 2. The clinical and demographic characteristics of the second cohort**

|                         | <b>Control group</b><br><b>(n=20)</b> | <b>Pre-diabetes group</b><br><b>(n=20)</b> | <b>T2DM group</b><br><b>(n=20)</b> | <b>P value</b> |
|-------------------------|---------------------------------------|--------------------------------------------|------------------------------------|----------------|
| Male gender             | 8(40.0%)                              | 11(55.0%)                                  | 12(60.0%)                          | 0.42           |
| Age(years)              | 49.6±4.7                              | 47.2±5.9                                   | 51.1±5.5                           | 0.083          |
| Hypertension            | 5(25.0%)                              | 6 (30.0%)                                  | 8 (40.0%)                          | 0.583          |
| Smoker                  | 3(15.0%)                              | 5(25.0%)                                   | 5(25.0%)                           | 0.675          |
| BMI(kg/m <sup>2</sup> ) | 23.6±2.1                              | 22.8±2.2                                   | 23.7±2.0                           | 0.343          |

|                 |          |          |          |        |
|-----------------|----------|----------|----------|--------|
| TC(mmol/L)      | 3.7±0.8  | 3.9±1.0  | 4.2±0.9  | 0.196  |
| TG(mmol/L)      | 1.5±0.4  | 1.6±0.5  | 1.7±0.7  | 0.342  |
| HDL(mmol/L)     | 1.3±0.5  | 1.1±0.2  | 1.1±0.3  | 0.501  |
| LDL(mmol/L)     | 2.5±0.6  | 2.8±0.6  | 2.8±0.6  | 0.083  |
| ALT(U/L)        | 24.8±6.6 | 24.1±2.9 | 27.7±7.6 | 0.415  |
| AST(U/L)        | 24.9±5.6 | 26.1±4.4 | 23.2±4.5 | 0.169  |
| Scr(μmol/L)     | 59.2±6.5 | 58.3±8.0 | 61.2±4.9 | 0.387  |
| FT4I(pmol/L)    | 14.3±1.6 | 15.2±2.4 | 13.9±1.9 | 0.111  |
| HbA1c (%)       | 5.0±0.2  | 6.0±0.2  | 7.5±0.7  | <0.001 |
| HbA1c(mmol/mol) | 31.2±2.6 | 42.1±2.2 | 58.2±7.1 | <0.001 |
| GLU(mmol/L)     | 5.0±0.4  | 6.5±0.2  | 7.9±0.6  | <0.001 |
| OGTT 2h(mmol/L) | 6.8±0.5  | 8.9±1.4  | 12.9±1.0 | <0.001 |

**Supplementary Table 3. The clinical and demographic characteristics of the third cohort**

|                         | <b>Control group</b><br>(n=60) | <b>Pre-diabetes group</b><br>(n=63) | <b>T2DM group</b><br>(n=64) | <b>P value</b> |
|-------------------------|--------------------------------|-------------------------------------|-----------------------------|----------------|
| Male gender             | 29(48.3%)                      | 32(50.8%)                           | 35(54.7%)                   | 0.774          |
| Age(years)              | 49.0±5.5                       | 49.0±6.6                            | 50.6±5.7                    | 0.222          |
| Hypertension            | 21(35.0%)                      | 25(39.7%)                           | 31 (48.4%)                  | 0.302          |
| Smoker                  | 12(20.0%)                      | 13(20.6%)                           | 18(28.1%)                   | 0.484          |
| BMI(kg/m <sup>2</sup> ) | 24.5±3.8                       | 25.0±3.1                            | 23.9±3.8                    | 0.192          |
| TC(mmol/L)              | 3.6±0.7                        | 4.1±0.8                             | 4.3±0.5                     | <0.001         |
| TG(mmol/L)              | 1.4±0.4                        | 1.6±0.3                             | 1.5±0.4                     | 0.038          |
| HDL(mmol/L)             | 1.0±0.2                        | 1.1±0.3                             | 1.0±0.2                     | 0.362          |
| LDL(mmol/L)             | 2.5±0.8                        | 2.6±0.6                             | 2.5±0.4                     | 0.553          |
| ALT(U/L)                | 25.5±8.4                       | 26.5±4.8                            | 26.3±5.9                    | 0.648          |
| AST(U/L)                | 23.2±5.6                       | 24.8±3.1                            | 24.5±4.6                    | 0.156          |
| Scr(μmol/L)             | 58.0±8.1                       | 59.8±6.1                            | 59.6±6.0                    | 0.27           |
| FT4I(pmol/L)            | 14.4±1.6                       | 15.0±2.5                            | 14.9±2.2                    | 0.212          |

---

|                 |          |          |          |        |
|-----------------|----------|----------|----------|--------|
| HbA1c (%)       | 5.0±0.4  | 5.9±0.3  | 7.5±0.6  | <0.001 |
| HbA1c(mmol/mol) | 31.6±4.5 | 40.6±2.9 | 57.8±5.9 | <0.001 |
| GLU(mmol/L)     | 4.8±0.5  | 6.2±0.3  | 8.2±1.0  | <0.001 |
| OGTT 2h(mmol/L) | 6.6±0.4  | 8.6±0.9  | 14.4±1.8 | <0.001 |

---

BMI: body mass index; TC: total cholesterol; TG: triglyceride; HDL: high density lipoprotein; LDL: low density lipoprotein; ALT: alanine transaminase; AST: aspartate transaminase; Scr: serum creatinine, FT4I: free thyroxine index; GLU: glucose; OGTT: oral glucose tolerance test
