# Supplementary material for: Hsa_circ_0054633 in peripheral blood can be used as a diagnostic biomarker of pre-diabetes and type 2 diabetes mellitus
Source: Springer Nature journal article supplement (doi:10.1007/s00592-016-0943-0), 2016-11-23
Supplement: MOESM2 [file 11089336]

**Supplementary Table 4. Nucleotide sequences of primers used for Q-RCR**

|                  | <b>Forward</b>            | <b>Reverse</b>            | <b>Product length</b> |
|------------------|---------------------------|---------------------------|-----------------------|
| hsa_circ_0068087 | TCATTCCTCTATTTGTACAGTGGCT | GGCCCCTCAGTGTACGTCTT      | 141                   |
| hsa_circ_0054633 | TTGCTTTCTACACTTTCAGGTGAC  | GCTTTTTGTCTGTAGTCAACCACCA | 110                   |
| hsa_circ_0124636 | TTGCATTGTGGGCGGTATGC      | TCCCCGGGTATACAAAAGTGAGA   | 127                   |
| hsa_circ_0139110 | CCAAGCAGTCACAGAAGCTGG     | ATACAGGCACCCAGGTAGGC      | 148                   |
| hsa_circ_0018508 | TCTTTGCCACATATTGGGTGACT   | ACACCAGGTACCGGTTATCCA     | 111                   |
| hGAPDH           | TGTTGCCATCAATGACCCCTT     | CTCCACGACGTACTCAGCG       | 202                   |
